# Supplementary material
Source: PubMed Central journal article supplement (PMC5898614)
Supplement: NIHMS955923-supplement-supplement_1.pdf [file NIHMS955923-supplement-supplement_1.pdf]

## Supplementary information

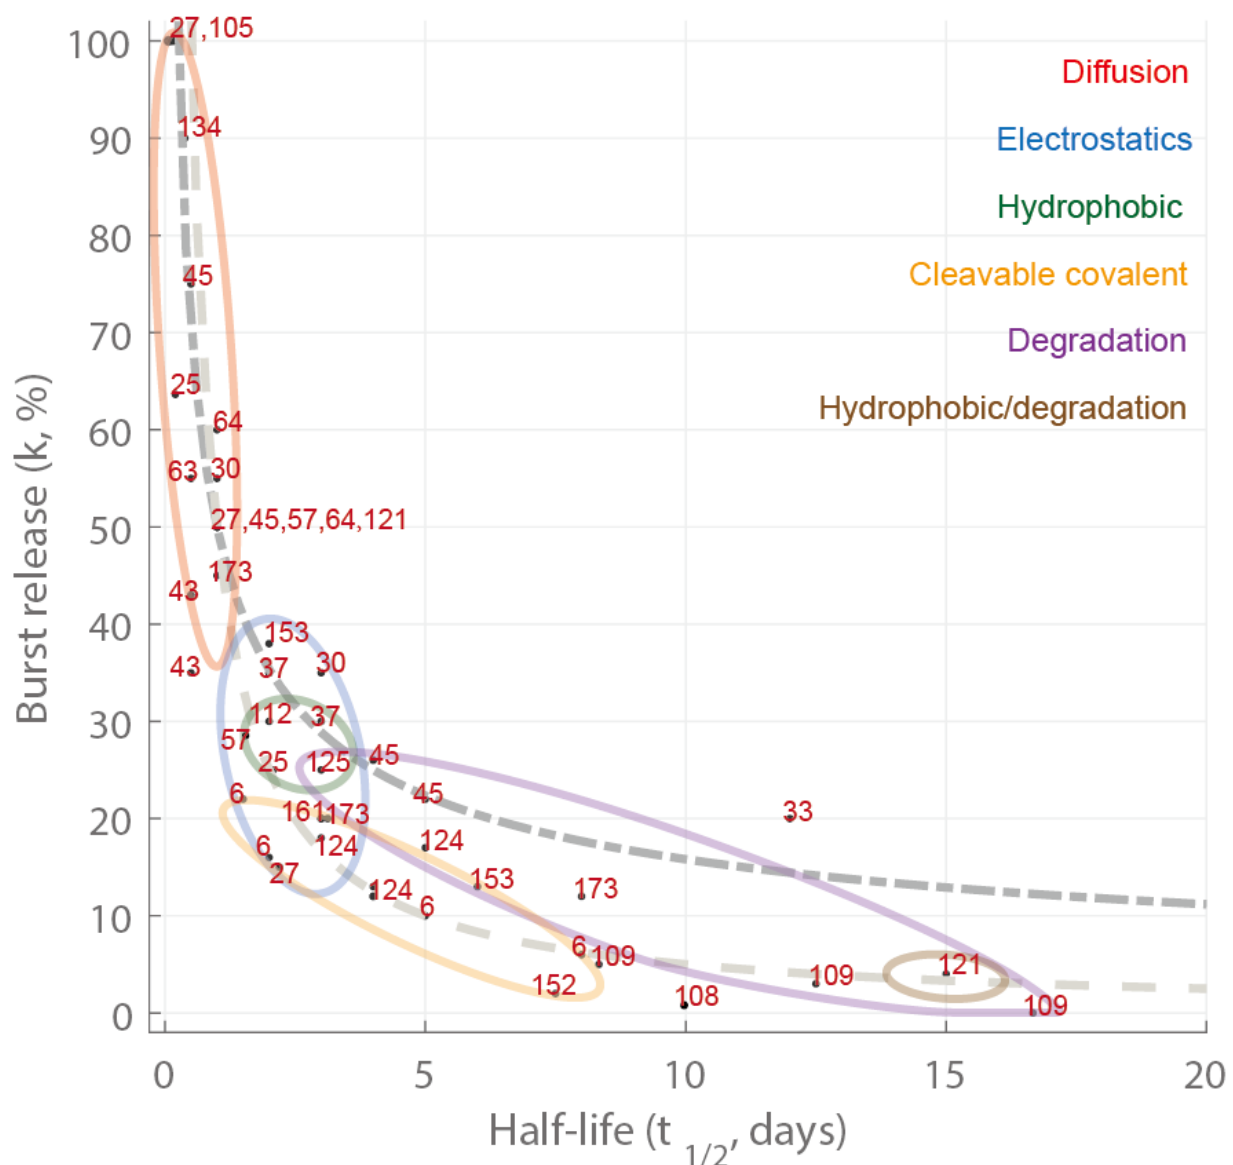

Figure S1| **Drug release property chart of hydrogels.** Each dot is labelled with the particular reference number. The coloured circles refer to different drug release mechanisms: diffusion-controlled mechanism (red), degradation-controlled mechanism (purple), affinity-controlled mechanisms based on cleavable covalent conjugation (orange), electrostatic interactions (blue), and hydrophobic association (green), as well as a combination of degradation-controlled and hydrophobic association-controlled mechanisms (brown).
